# Supplementary material
Source: PubMed Central journal article supplement (PMC5715597)
Supplement: BPH-174-4523-s001.pdf [file BPH-174-4523-s001.pdf]

**Table S1**(pmols g<sup>-1</sup>) expressed as mean (±) SEM

|                                        | Vehicle      | KML29        | GBP          | KML29:GBP    |
|----------------------------------------|--------------|--------------|--------------|--------------|
| Arachidonic Acid                       | 62 (4.5)     | 65.5 (6)     | 74 (6.6)     | 71 (7.4)     |
| Linoleic Acid                          | 50 (3.1)     | 66 (6.2)     | 51 (5)       | 86.5 (13.5)* |
| Oleic Acid                             | 51.11 (2.95) | 58.71 (5.40) | 53.74 (5.71) | 58.52 (7.27) |
| <i>N</i> -arachidonoyl-glycine         | 0.04 (0.01)  | 0.09 (0.02)  | 0.13 (0.05)* | 0.09 (0.02)  |
| <i>N</i> -docosahexaenoyl-glycine      | 0.01 (0.004) | 0.07 (0.01)  | 0.04 (0.02)  | 0.07 (0.02)  |
| <i>N</i> -linoleoyl-glycine            | 0.04 (0.01)  | 0.06 (0.03)  | 0.05 (0.02)  | 0.04 (0.02)  |
| <i>N</i> -oleoyl-glycine               | 0.74 (0.06)  | 0.77 (0.09)  | 0.69 (0.13)  | 0.64 (0.04)  |
| <i>N</i> -palmitoyl-glycine            | 1.34 (0.2)   | 1.78 (0.3)   | 1.4 (0.1)    | 1.7 (0.3)    |
| <i>N</i> -stearoyl-glycine             | 1.14 (0.23)  | 1.18 (0.14)  | 1.15 (0.11)  | 1.35 (0.20)  |
| 2-Arachidonoyl-glycerol                | 1896 (192)   | 6387 (323)*  | 2097 (393)   | 7350 (414)*  |
| 2-Linoleoyl-glycerol                   | 186 (18.8)   | 385 (31.8)*  | 219 (25.6)   | 461 (77)*    |
| 2-Oleoyl-glycerol                      | 587 (99)     | 778 (86.3)   | 700 (128)    | 979 (88)     |
| 2-Palmitoyl-glycerol                   | 91 (12.3)    | 118 (15.8)   | 111 (23.2)   | 148 (10.2)   |
| <i>N</i> -arachidonoyl ethanolamide    | 1.6 (0.2)    | 1.7 (0.2)    | 2.1 (0.3)    | 2.5 (0.3)*   |
| <i>N</i> -docosahexaenoyl ethanolamide | 7.9 (0.6)    | 8.5 (0.5)    | 9.1 (0.7)    | 9.4 (0.7)    |
| <i>N</i> -linoleoyl ethanolamide       | 1.9 (0.2)    | 2.8 (0.8)    | 3 (0.8)      | 4 (1.3)      |
| <i>N</i> -oleoyl ethanolamide          | 37 (4.3)     | 60.6 (20.2)  | 73 (26.8)    | 75 (13.7)    |
| <i>N</i> -palmitoyl ethanolamide       | 61.5 (6.1)   | 77 (10.2)    | 80 (15.2)    | 96 (8.5)     |
| <i>N</i> -stearoyl ethanolamide        | 20.2 (5.9)   | 34.4 (16.3)  | 46.6 (17.7)  | 38.7 (8)     |
| Prostaglandin E <sub>2</sub>           | 61 (3.6)     | 49 (3.6)*    | 81.8 (6)*    | 68 (5.4)     |
| Prostaglandin F <sub>2α</sub>          | 32.5 (9.8)   | 25.6 (7.9)   | 44 (14.8)    | 30 (11.5)    |
| 6-ketoPGF <sub>1α</sub>                | 17.6 (5.7)   | 10 (3.2)     | 20 (5.4)     | 8.8 (3.9)    |
| <i>N</i> -arachidonoyl taurine         | 11.4 (1)     | 13.6 (0.9)   | 13.4 (1.2)   | 15.2 (0.5)   |

Spinal cord levels are expressed as mean (SEM) in pmol·g<sup>-1</sup>.

Tissue was collected from mice with CCI 2 h after drug administration.

\*P < 0.05 versus vehicle, Dunnett's post hoc test.
